# Supplementary material for: Metabolomic Analyses of Plasma Reveals New Insights into Asphyxia and Resuscitation in Pigs
Source: PubMed Central journal article supplement (PMC2834759; doi:10.1371/journal.pone.0009606), 2010-03-09
Supplement: pone.0009606.s001.pdf [file pone.0009606.s001.pdf]

**Supplement:****Table 1****List of analyzed metabolites**

| <b>Acylcarnitines (41)</b> |                                                                                   |                   |
|----------------------------|-----------------------------------------------------------------------------------|-------------------|
| C0                         | Carnitine                                                                         | quantitative      |
| C2                         | Acetylcarnitine                                                                   | quantitative      |
| C3                         | Propionylcarnitine                                                                | quantitative      |
| C3:1                       | Propenoylcarnitine                                                                | semi-quantitative |
| C3-OH                      | Hydroxypropionylcarnitine                                                         | semi-quantitative |
| C4                         | Butyrylcarnitine / Isobutyrylcarnitine                                            | quantitative      |
| C4:1                       | Butenoylcarnitine                                                                 | semi-quantitative |
| C4-OH (C3-DC)              | Hydroxybutyrylcarnitine (Malonylcarnitine)                                        | semi-quantitative |
| C5                         | Valerylcarnitine / Isovalerylcarnitine / Methylbutyrylcarnitine                   | quantitative      |
| C5:1                       | Tiglylcarnitine / Methylcrotonylcarnitine                                         | semi-quantitative |
| C5:1-DC                    | Glutaconylcarnitine / Mesoconylcarnitine                                          | semi-quantitative |
| C5-DC (C6-OH)              | Glutaryl carnitine (Hydroxyhexanoylcarnitine)                                     | semi-quantitative |
| C5-M-DC                    | Methylglutaryl carnitine                                                          | semi-quantitative |
| C5-OH (C3-DC-M)            | Hydroxyvaleryl- / -isovaleryl- / -methylbutyrylcarnitine (Methylmalonylcarnitine) | semi-quantitative |
| C6 (C4:1-DC)               | Hexanoylcarnitine (Fumaryl carnitine)                                             | semi-quantitative |
| C6:1                       | Hexenoylcarnitine                                                                 | semi-quantitative |
| C7-DC                      | Pimelylcarnitine                                                                  | semi-quantitative |
| C8                         | Octanoylcarnitine                                                                 | quantitative      |
| C8:1                       | Octenoylcarnitine                                                                 | semi-quantitative |
| C9                         | Nonanoylcarnitine                                                                 | semi-quantitative |
| C10                        | Decanoylcarnitine                                                                 | quantitative      |
| C10:1                      | Decenoylcarnitine                                                                 | semi-quantitative |
| C10:2                      | Decadienylcarnitine                                                               | semi-quantitative |
| C12                        | Dodecanoylcarnitine                                                               | quantitative      |
| C12:1                      | Dodecenoylcarnitine                                                               | semi-quantitative |
| C12-DC                     | Dodecanedioylcarnitine                                                            | semi-quantitative |
| C14                        | Tetradecanoylcarnitine                                                            | quantitative      |
| C14:1                      | Tetradecenoylcarnitine                                                            | semi-quantitative |
| C14:1-OH                   | Hydroxytetradecenoylcarnitine                                                     | semi-quantitative |
| C14:2                      | Tetradecadienylcarnitine                                                          | semi-quantitative |
| C14:2-OH                   | Hydroxytetradecadienylcarnitine                                                   | semi-quantitative |
| C16                        | Hexadecanoylcarnitine                                                             | quantitative      |
| C16:1                      | Hexadecenoylcarnitine                                                             | semi-quantitative |
| C16:1-OH                   | Hydroxyhexadecenoylcarnitine                                                      | semi-quantitative |
| C16:2                      | Hexadecadienylcarnitine                                                           | semi-quantitative |
| C16:2-OH                   | Hydroxyhexadecadienylcarnitine                                                    | semi-quantitative |
| C16-OH                     | Hydroxyhexadecanoylcarnitine                                                      | semi-quantitative |
| C18                        | Octadecanoylcarnitine                                                             | quantitative      |
| C18:1                      | Octadecenoylcarnitine                                                             | semi-quantitative |
| C18:1-OH                   | Hydroxyoctadecenoylcarnitine                                                      | semi-quantitative |
| C18:2                      | Octadecadienylcarnitine                                                           | semi-quantitative |

| Amino acids (21)                           |                   | Bile acids (17)                                                                               |              |
|--------------------------------------------|-------------------|-----------------------------------------------------------------------------------------------|--------------|
| Alanine                                    | quantitative      | Cholic acid                                                                                   | quantitative |
| Arginine                                   | quantitative      | Chenodeoxycholic acid                                                                         | quantitative |
| Asparagine                                 | quantitative      | Deoxycholic acid                                                                              | quantitative |
| Aspartic acid                              | quantitative      | Glycocholic acid                                                                              | quantitative |
| Citrulline                                 | quantitative      | Glycochenodeoxycholic acid                                                                    | quantitative |
| Glutamine                                  | quantitative      | Glycodeoxycholic acid                                                                         | quantitative |
| Glutamic acid                              | quantitative      | Glycolithocholic acid                                                                         | quantitative |
| Glycine                                    | quantitative      | Glycolithocholic acid sulfate                                                                 | quantitative |
| Histidine                                  | quantitative      | Glycoursodeoxycholic acid                                                                     | quantitative |
| Isoleucine                                 | quantitative      | Lithocholic acid                                                                              | quantitative |
| Leucine                                    | quantitative      | Taurocholic acid                                                                              | quantitative |
| Lysine                                     | semi-quantitative | Taurochenodeoxycholic acid                                                                    | quantitative |
| Methionine                                 | quantitative      | Taurodeoxycholic acid                                                                         | quantitative |
| Ornithine                                  | quantitative      | Taurolithocholic acid                                                                         | quantitative |
| Phenylalanine                              | quantitative      | Taurolithocholic acid sulfate                                                                 | quantitative |
| Proline                                    | quantitative      | Tauroursodeoxycholic acid                                                                     | quantitative |
| Serine                                     | quantitative      | Ursodeoxycholic acid                                                                          | quantitative |
| Threonine                                  | quantitative      |                                                                                               |              |
| Tryptophan                                 | quantitative      | <b>Eicosanoids and other Oxidation Products of Polyunsaturated Fatty acids (PUFA's)* (17)</b> |              |
| Tyrosine                                   | quantitative      | Leukotriene B4                                                                                | quantitative |
| Valine                                     | quantitative      | Thromboxane B2                                                                                | quantitative |
|                                            |                   | Leukotriene D4                                                                                | quantitative |
| <b>Biogenic Amines and Polyamines (14)</b> |                   | Prostaglandin E2                                                                              | quantitative |
| Asymmetric dimethylarginine                | quantitative      | 8-iso-Prostaglandin F2 $\alpha$                                                               | quantitative |
| Symmetric dimethylarginine                 | quantitative      | Prostaglandin F2 $\alpha$                                                                     | quantitative |
| Total dimethylarginine                     | quantitative      | 6-keto-Prostaglandin F1 $\alpha$                                                              | quantitative |
| Histamine                                  | quantitative      | Prostaglandin D2                                                                              | quantitative |
| Methionine-sulfoxide                       | quantitative      | 9S-HODE                                                                                       | quantitative |
| Kynurenine                                 | quantitative      | 13S-HODE                                                                                      | quantitative |
| Hydroxykynurenine                          | quantitative      | 14(15)-EpETE                                                                                  | quantitative |
| Putrescine                                 | quantitative      | 12S-HETE                                                                                      | quantitative |
| Spermidine                                 | semi-quantitative | 15S-HETE                                                                                      | quantitative |
| Spermine                                   | semi-quantitative | 15S-HpETE                                                                                     | quantitative |
| Serotonin                                  | semi-quantitative | 5S-HpETE                                                                                      | quantitative |
| Phenylethylamine                           | quantitative      | Arachidonic acid                                                                              | quantitative |
| Nitrotyrosine                              | quantitative      | Docosahexaenoic acid                                                                          | quantitative |
| Creatinine                                 | quantitative      |                                                                                               |              |

| Energy Metabolism (17)                              |                   |
|-----------------------------------------------------|-------------------|
| 3-Phosphoglycerate                                  | semi-quantitative |
| $\alpha$ -Ketoglutaric acid                         | quantitative      |
| Adenosine-5'-monophosphate                          | semi-quantitative |
| Arginine                                            | quantitative      |
| Aspartate                                           | quantitative      |
| 3'-5'-cyclic Adenosine monophosphate                | semi-quantitative |
| Dihydroxyacetonephosphate + 3-Phosphoglyceraldehyde | semi-quantitative |

|                                                                                         |                   |
|-----------------------------------------------------------------------------------------|-------------------|
| Fumarate                                                                                | quantitative      |
| Glutamate                                                                               | quantitative      |
| Hexose (e.g. Glucose)                                                                   | quantitative      |
| Hexosephosphate (e.g. Glucose-1-phosphate + Glucose-6-phosphate + Fructose-6-phosphate) | quantitative      |
| Lactate                                                                                 | quantitative      |
| Pentosephosphate (e.g. Ribose-5-phosphate + Ribulose-5-phosphate)                       | semi-quantitative |
| Phosphoenolpyruvate                                                                     | semi-quantitative |
| Pyruvate + Oxaloacetate                                                                 | quantitative      |
| Succinate                                                                               | quantitative      |
| Tetrosephosphate (e.g. Erythrose-4-phosphate)                                           | semi-quantitative |

| Glycerophospholipids* (92) |                   |                |                   |
|----------------------------|-------------------|----------------|-------------------|
| PC aa C24:0                | semi-quantitative | PC ae C34:3    | semi-quantitative |
| PC aa C26:0                | semi-quantitative | PC ae C36:0    | semi-quantitative |
| PC aa C28:1                | semi-quantitative | PC ae C36:1    | semi-quantitative |
| PC aa C30:0                | semi-quantitative | PC ae C36:2    | semi-quantitative |
| PC aa C30:2                | semi-quantitative | PC ae C36:3    | semi-quantitative |
| PC aa C32:0                | semi-quantitative | PC ae C36:4    | semi-quantitative |
| PC aa C32:1                | semi-quantitative | PC ae C36:5    | semi-quantitative |
| PC aa C32:2                | semi-quantitative | PC ae C38:0    | semi-quantitative |
| PC aa C32:3                | semi-quantitative | PC ae C38:1    | semi-quantitative |
| PC aa C34:1                | semi-quantitative | PC ae C38:2    | semi-quantitative |
| PC aa C34:2                | semi-quantitative | PC ae C38:3    | semi-quantitative |
| PC aa C34:3                | semi-quantitative | PC ae C38:4    | semi-quantitative |
| PC aa C34:4                | semi-quantitative | PC ae C38:5    | semi-quantitative |
| PC aa C36:0                | semi-quantitative | PC ae C38:6    | semi-quantitative |
| PC aa C36:1                | semi-quantitative | PC ae C40:0    | semi-quantitative |
| PC aa C36:2                | semi-quantitative | PC ae C40:1    | semi-quantitative |
| PC aa C36:3                | semi-quantitative | PC ae C40:2    | semi-quantitative |
| PC aa C36:4                | semi-quantitative | PC ae C40:3    | semi-quantitative |
| PC aa C36:5                | semi-quantitative | PC ae C40:4    | semi-quantitative |
| PC aa C36:6                | semi-quantitative | PC ae C40:5    | semi-quantitative |
| PC aa C38:0                | semi-quantitative | PC ae C40:6    | semi-quantitative |
| PC aa C38:1                | semi-quantitative | PC ae C42:0    | semi-quantitative |
| PC aa C38:3                | semi-quantitative | PC ae C42:1    | semi-quantitative |
| PC aa C38:4                | semi-quantitative | PC ae C42:2    | semi-quantitative |
| PC aa C38:5                | semi-quantitative | PC ae C42:3    | semi-quantitative |
| PC aa C38:6                | semi-quantitative | PC ae C42:4    | semi-quantitative |
| PC aa C40:1                | semi-quantitative | PC ae C42:5    | semi-quantitative |
| PC aa C40:2                | semi-quantitative | PC ae C44:3    | semi-quantitative |
| PC aa C40:3                | semi-quantitative | PC ae C44:4    | semi-quantitative |
| PC aa C40:4                | semi-quantitative | PC ae C44:5    | semi-quantitative |
| PC aa C40:5                | semi-quantitative | PC ae C44:6    | semi-quantitative |
| PC aa C40:6                | semi-quantitative | lysoPC a C6:0  | semi-quantitative |
| PC aa C42:0                | semi-quantitative | lysoPC a C14:0 | semi-quantitative |
| PC aa C42:1                | semi-quantitative | lysoPC a C16:0 | semi-quantitative |
| PC aa C42:2                | semi-quantitative | lysoPC a C16:1 | semi-quantitative |

|             |                   |                |                   |
|-------------|-------------------|----------------|-------------------|
| PC aa C42:4 | semi-quantitative | lysoPC a C17:0 | semi-quantitative |
| PC aa C42:5 | semi-quantitative | lysoPC a C18:0 | semi-quantitative |
| PC aa C42:6 | semi-quantitative | lysoPC a C18:1 | semi-quantitative |
| PC ae C30:0 | semi-quantitative | lysoPC a C18:2 | semi-quantitative |
| PC ae C30:1 | semi-quantitative | lysoPC a C20:3 | semi-quantitative |
| PC ae C30:2 | semi-quantitative | lysoPC a C20:4 | semi-quantitative |
| PC ae C32:1 | semi-quantitative | lysoPC a C24:0 | semi-quantitative |
| PC ae C32:2 | semi-quantitative | lysoPC a C26:0 | semi-quantitative |
| PC ae C34:0 | semi-quantitative | lysoPC a C26:1 | semi-quantitative |
| PC ae C34:1 | semi-quantitative | lysoPC a C28:0 | semi-quantitative |
| PC ae C34:2 | semi-quantitative | lysoPC a C28:1 | semi-quantitative |

| <b>Oxysterols (16)</b>                   |                   |
|------------------------------------------|-------------------|
| 22-R-Hydroxycholesterol                  | quantitative      |
| 24-S-Hydroxycholesterol                  | quantitative      |
| 25-Hydroxycholesterol                    | quantitative      |
| 27-Hydroxycholesterol                    | quantitative      |
| 22S-Hydroxycholesterol                   | quantitative      |
| 24,25-Epoxycholesterol                   | quantitative      |
| 7 $\alpha$ -Hydroxycholesterol           | quantitative      |
| 7-Ketcholesterol                         | quantitative      |
| 5 $\beta$ ,6 $\beta$ -Epoxycholesterol   | quantitative      |
| 5 $\alpha$ ,6 $\alpha$ -Epoxycholesterol | quantitative      |
| 4 $\beta$ -Hydroxycholesterol            | quantitative      |
| Desmosterol                              | quantitative      |
| 7-Dehydrocholesterol                     | quantitative      |
| Cholestenone                             | quantitative      |
| Lanosterol                               | semi-quantitative |
| 24-Dihydrolanosterol                     | quantitative      |

| <b>Sphingolipids (Sphingomyelins)* (15)</b> |                   |
|---------------------------------------------|-------------------|
| SM (OH) C14:1                               | semi-quantitative |
| SM C16:0                                    | semi-quantitative |
| SM C16:1                                    | semi-quantitative |
| SM (OH) C16:1                               | semi-quantitative |
| SM C18:0                                    | semi-quantitative |
| SM C18:1                                    | semi-quantitative |
| SM C20:2                                    | semi-quantitative |
| SM C22:3                                    | semi-quantitative |
| SM (OH) C22:1                               | semi-quantitative |
| SM (OH) C22:2                               | semi-quantitative |
| SM C24:0                                    | semi-quantitative |
| SM C24:1                                    | semi-quantitative |
| SM (OH) C24:1                               | semi-quantitative |
| SM C26:0                                    | semi-quantitative |
| SM C26:1                                    | semi-quantitative |

\*) validated analytical method (FDA guidance for industry)

## Analysed ratio`s

| Definition          | Numerator                                                               | Denominator                            |
|---------------------|-------------------------------------------------------------------------|----------------------------------------|
| Orn/Cit             | Ornithine                                                               | Citrulline                             |
| Orn/Arg             | Ornithine                                                               | Arginine                               |
| Cit/Arg             | Citrulline                                                              | Arginine                               |
| Glu/Gln             | Glutamate                                                               | Glutamine                              |
| Asp/Asn             | Aspartic acid                                                           | Asparagine                             |
| Ala/Lys             | Alanine                                                                 | Lysine                                 |
| Phe/Tyr             | Phenylalanine                                                           | Tyrosine                               |
| Serotonin/Trp       | Serotonin                                                               | Tryptophane                            |
| Kyn/Trp             | Kynurenine                                                              | Tryptophane                            |
| Kyn/OHKyn           | Kynurenine                                                              | Hydrokynurenine                        |
| Putrescine/Orn      | Putrescine                                                              | Ornithine                              |
| Spermine/Spermidine | Spermine                                                                | Spermidine                             |
| SDMA/ADMA           | Symmetric dimethylarginine                                              | Asymmetric dimethylarginine            |
| Met-SO/Met          | Methionine-Sulfoxide                                                    | Methionine                             |
| Ala/BCAA            | Alanine                                                                 | G.M. of Valine, Isoleucine and Leucine |
| Gly/BCAA            | Glycine                                                                 | G.M. of Valine, Isoleucine and Leucine |
| SumLyso             | G.M. of 15 LysoPC                                                       |                                        |
| SumPC+Lyso          | G.M. of 92 LysoPC and PC                                                |                                        |
| SumPC               | G.M. of 77 PC                                                           |                                        |
| SumSM               | G.M. of 15 SM                                                           |                                        |
| SumSMOH/SumSM       | G.M. of 5 SM(OH)<br>G.M. of palmitoylcarnitine and<br>stearyl carnitine | G.M. of 10 SM<br><br>Carnitine (free)  |
| C16+C18/C0          |                                                                         |                                        |
| SumMUFA             | G.M. of 26 mono-unsaturated lipids                                      |                                        |
| SumPUFA             | G.M. of 82 poly-unsaturated lipids                                      |                                        |
| SumSFA              | G.M. of 25 saturated lipids                                             |                                        |
| PUFA/SFA            | G.M. of 82 poly-unsaturated lipids                                      | G.M. of 25 saturated lipids            |
| PUFA/MUFA           | G.M. of 82 poly-unsaturated lipids                                      | G.M. of 26 mono-unsaturated lipids     |
| MUFA/SFA            | G.M. of 26 mono-unsaturated lipids                                      | G.M. of 25 saturated lipids            |
